# Supplementary material for: DUSP1 promoter methylation in peripheral blood leukocyte is associated with triple-negative breast cancer risk
Source: PubMed Central journal article supplement (PMC5318948; doi:10.1038/srep43011), 2017-02-21
Supplement: srep43011-s1.pdf [file srep43011-s1.pdf]

## Title Page

### ***DUSP1* promoter methylation in peripheral blood leukocyte is associated with triple-negative breast cancer**

Jing Li<sup>1#</sup>, Yanbo Chen<sup>2#</sup>, Hongyuan Yu<sup>1</sup>, Jingshen Tian<sup>1</sup>, Fengshun Yuan<sup>1</sup>, Jialong Fan<sup>1</sup>,  
Yupeng Liu<sup>1</sup>, Lin Zhu<sup>1</sup>, Fan Wang<sup>1\*</sup>, Yashuang Zhao<sup>1\*</sup>, Da Pang<sup>2\*</sup>

<sup>1</sup>Department of Epidemiology, School of Public Health, Harbin Medical University, Harbin, Heilongjiang Province, P. R. China.

<sup>2</sup>Department of Breast Surgery, The Affiliated Tumor Hospital of Harbin Medical University, Harbin, Heilongjiang Province, P. R. China.

**#First author:** Jing Li and Yanbo Chen are co-first authors of this paper.

**\*Corresponding author:**

**Fan Wang**, Department of Epidemiology, School of Public Health, Harbin Medical University. 157 Baojian Rd, Nangang District, Harbin Medical University, Harbin, Heilongjiang Province, P. R. China. Tel: 0086-(0)451-86611797. Fax: 0086-(0)451-87502885. E-mail: yifan.701@163.com

**Yashuang Zhao**, Department of Epidemiology, School of Public Health, Harbin Medical University. 157 Baojian Rd, Nangang District, Harbin Medical University, Harbin, Heilongjiang Province, P. R. China. Tel: 0086-(0)451-86611797. Fax: 0086-(0)451-87502885. E-mail: zhao\_yashuang@263.net.

**Da Pang**, Department of Breast Surgery. The Affiliated Tumor Hospital of Harbin Medical University. 150 Haping Road, Nangang district, Harbin, Heilongjiang Province,

P. R. China. Tel: 0086-(0)451-86298613. Fax:0086-(0)451-86663760. E-mail :

[pangda@ems.hrbmu.edu.cn](mailto:pangda@ems.hrbmu.edu.cn)

**Supplemental Table 1**

Demographic characteristics of breast cancer patients and controls

| <b>Characteristics</b>                | <b>Cases<br/>No. (%)</b> | <b>Controls<br/>No. (%)</b> | <b>P-value</b> |
|---------------------------------------|--------------------------|-----------------------------|----------------|
|                                       | 423                      | 509                         |                |
| Age                                   |                          |                             |                |
| <40                                   | 43 (10.2)                | 61 (12.0)                   | 0.276          |
| 40-49                                 | 145 (34.3)               | 163 (32.0)                  |                |
| 50-59                                 | 149 (35.2)               | 160 (31.4)                  |                |
| 60                                    | 86(20.3)                 | 125(24.6)                   |                |
| Marital status <sup>a</sup>           |                          |                             |                |
| single                                | 46 (10.9)                | 34 (6.7)                    | <b>0.023</b>   |
| married                               | 376 (89.1)               | 473 (93.3)                  |                |
| Education level <sup>a</sup>          |                          |                             |                |
| Primary and below                     | 99 (23.4)                | 148 (29.2)                  | <b>0.002</b>   |
| Junior high school                    | 147 (34.8)               | 167 (32.9)                  |                |
| Senior middle school                  | 106 (25.1)               | 145 (28.6)                  |                |
| College and above                     | 71(16.8)                 | 47 (9.3)                    |                |
| Occupation <sup>a</sup>               |                          |                             |                |
| Mental worker                         | 103 (26.9)               | 85 (17.4)                   | <b>0.001</b>   |
| Manual worker                         | 139 (36.3)               | 226 (46.2)                  |                |
| Mixed                                 | 141 (36.8)               | 178 (36.4)                  |                |
| Family history of cancer <sup>a</sup> |                          |                             |                |
| Yes                                   | 117 (28.1)               | 71 (15.8)                   | <b>0.000</b>   |
| No                                    | 300 (71.9)               | 379 (84.2)                  |                |
| BMI <sup>a</sup> (kg/m <sup>2</sup> ) |                          |                             |                |
| 18.5                                  | 11 (2.6)                 | 21 (4.1)                    | 0.154          |
| 18.5-23.0                             | 180 (42.8)               | 190 (37.5)                  |                |
| 23.0                                  | 230 (54.6)               | 296 (58.4)                  |                |

<sup>a</sup>Missing values: Marital status 3; BMI 4; Education level 2; Occupation 60; Family history of cancer 65.

**Supplemental Table 2**

Demographic characteristics of breast cancer patients with tumour tissues

| Characteristics                | <i>DUSP1</i> methylation status |                      | P-value |
|--------------------------------|---------------------------------|----------------------|---------|
|                                | Methylated No. (%)              | Unmethylated No. (%) |         |
| Age <sup>a</sup>               | 193(59.2)                       | 133(40.8)            | 0.852   |
| <50                            | 74(38.3)                        | 47(36.2)             |         |
| 50-59                          | 75(38.9)                        | 50(38.5)             |         |
| >60                            | 44(22.8)                        | 33(25.4)             |         |
| Mean $\pm$ SD                  | 52.91 $\pm$ 9.36                | 53.27 $\pm$ 8.91     | 0.732   |
| Marriage status <sup>a</sup>   |                                 |                      | 0.649   |
| Single                         | 19(9.9)                         | 11(8.4)              |         |
| Married                        | 173(90.1)                       | 120(91.6)            |         |
| Educational level <sup>a</sup> |                                 |                      | 0.257   |
| Primary and below              | 55(28.6)                        | 40(30.1)             |         |
| Junior/senior high school      | 115(59.9)                       | 70(52.6)             |         |
| College and above              | 22(11.5)                        | 23(17.3)             |         |
| Occupation <sup>a</sup>        |                                 |                      | 0.797   |
| Mental worker                  | 46(27.2)                        | 35(29.2)             |         |
| Manual worker                  | 57(33.7)                        | 36(30.0)             |         |
| Mixed                          | 66(39.1)                        | 49(40.8)             |         |
| Family history <sup>a</sup>    |                                 |                      | 0.984   |
| Yes                            | 41(21.7)                        | 27(21.6)             |         |
| No                             | 148(78.3)                       | 98(78.4)             |         |
| BMI <sup>a</sup>               |                                 |                      | 0.296   |
| <18.5                          | 7(3.6)                          | 4(3.1)               |         |
| 18.5-22.9                      | 79(40.9)                        | 43(32.8)             |         |
| 23                             | 107(55.4)                       | 84(64.1)             |         |
| Mean $\pm$ SD                  | 23.90 $\pm$ 3.74                | 24.33 $\pm$ 3.94     | 0.322   |

<sup>a</sup>Missing values: age 3; marriage status 3; educational level 1; family history 12; occupation 37; BMI 2.

**Supplemental Table 3**

Univariate and multivariate analyses for the association of environmental factors and breast cancer risk

| <b>Factor</b>                | <b>Cases<br/>No. (%)</b> | <b>Controls<br/>No. (%)</b> | <b>OR<sub>crude</sub>(95%CI)</b> | <b>P-<br/>value</b> | <b>OR<sub>adj</sub>(95%CI)</b> | <b>P-<br/>value</b> |
|------------------------------|--------------------------|-----------------------------|----------------------------------|---------------------|--------------------------------|---------------------|
|                              | 423                      | 509                         |                                  |                     |                                |                     |
| Refined grain (g/day)        |                          |                             |                                  |                     |                                |                     |
| <100                         | 260(74.3)                | 290(57.4)                   | 1.000                            |                     | 1.000                          |                     |
| 100                          | 90(25.7)                 | 215(42.6)                   | 0.467(0.347-0.629)               | 0.000               | 0.434(0.308-0.610)             | <b>0.000</b>        |
| Coarse grains(g/week)        |                          |                             |                                  |                     |                                |                     |
| <50                          | 200 (56.8)               | 247 (48.9)                  | 1.000                            |                     | 1.000                          |                     |
| 50                           | 152(43.2)                | 258(51.1)                   | 0.728(0.553-0.957)               | 0.023               | 0.755(0.554-1.029)             | 0.075               |
| Vegetable(g/day)             |                          |                             |                                  |                     |                                |                     |
| <500                         | 283(68.2)                | 261(52.0)                   | 1.000                            |                     | 1.000                          |                     |
| 500                          | 132(31.8)                | 241(48.0)                   | 0.505(0.385-0.662)               | 0.00                | 0.657(0.487-0.888)             | <b>0.006</b>        |
| Fruit(g/week)                |                          |                             |                                  |                     |                                |                     |
| <1000                        | 216(52.4)                | 291(58.3)                   | 1.000                            |                     | 1.000                          |                     |
| 1000                         | 196(47.6)                | 208(41.7)                   | 1.269(0.976-1.651)               | 0.075               | 1.569(1.164-2.114)             | <b>0.003</b>        |
| Fat meat                     |                          |                             |                                  |                     |                                |                     |
| No                           | 292(69.2)                | 341(68.6)                   | 1.000                            |                     | 1.000                          |                     |
| Yes                          | 130(30.8)                | 156(31.4)                   | 0.973(0.735-1.288)               | 0.849               | 0.927(0.677-1.269)             | 0.637               |
| Beef and mutton (g/week)     |                          |                             |                                  |                     |                                |                     |
| <250                         | 382(90.3)                | 434(85.6)                   | 1.000                            |                     | 1.000                          |                     |
| 250                          | 41(9.7)                  | 73(14.4)                    | 0.638(0.425-0.958)               | 0.030               | 0.564(0.361-0.883)             | <b>0.012</b>        |
| Pork(g/week)                 |                          |                             |                                  |                     |                                |                     |
| <250                         | 236(57.1)                | 291(60.1)                   | 1.000                            |                     | 1.000                          |                     |
| 250                          | 177(42.9)                | 193(39.9)                   | 1.131(0.866-1.476)               | 0.366               | 0.997(0.737-1.349)             | 0.985               |
| Poultry meat (g/week)        |                          |                             |                                  |                     |                                |                     |
| <250                         | 375(90.8)                | 426(88.2)                   | 1.000                            |                     | 1.000                          |                     |
| 250                          | 38(9.2)                  | 57(11.8)                    | 0.757(0.491-1.168)               | 0.209               | 0.711(0.443-1.140)             | 0.156               |
| Freshwater fish(times/month) |                          |                             |                                  |                     |                                |                     |
| <1                           | 172(41.3)                | 222(43.7)                   | 1.000                            |                     | 1.000                          |                     |
| 1                            | 244(58.7)                | 286(56.3)                   | 1.101(0.847-1.431)               | 0.472               | 1.154(0.857-1.555)             | 0.346               |
| Seafood(times/month)         |                          |                             |                                  |                     |                                |                     |
| <1                           | 378(91.3)                | 421(83.2)                   | 1.000                            |                     | 1.000                          |                     |
| 1                            | 36(8.7)                  | 85(16.8)                    | 0.472(0.312-0.713)               | 0.000               | 0.528(0.325-0.857)             | <b>0.010</b>        |
| Soybean(times/week)          |                          |                             |                                  |                     |                                |                     |
| <1                           | 184(44.6)                | 201(39.7)                   | 1.000                            |                     | 1.000                          |                     |
| 1                            | 229(55.4)                | 305(60.3)                   | 0.820(0.630-1.067)               | 0.140               | 0.794(0.590-1.069)             | 0.129               |
| Milk(times/week)             |                          |                             |                                  |                     |                                |                     |
| <3                           | 310(74.0)                | 300(59.8)                   | 1.000                            |                     | 1.000                          |                     |
| 3                            | 109(26.0)                | 202(40.2)                   | 0.522(0.394-0.692)               | 0.000               | 0.487(0.349-0.679)             | <b>0.000</b>        |
| Egg(per week)                |                          |                             |                                  |                     |                                |                     |
| 3                            | 177(42.0)                | 229(45.0)                   | 1.000                            |                     | 1.000                          |                     |
| >3                           | 244(58.0)                | 280(55.0)                   | 1.127(0.869-1.463)               | 0.367               | 0.957(0.711-1.288)             | 0.771               |

|                             |           |            |                    |       |                    |              |  |
|-----------------------------|-----------|------------|--------------------|-------|--------------------|--------------|--|
| Dessert(times/week)         |           |            |                    |       |                    |              |  |
| <2                          | 315(74.6) | 347(68.8)  | 1.000              |       | 1.000              |              |  |
| 2                           | 107(25.4) | 157(31.2)  | 0.751(0.562-1.003) | 0.052 | 0.744(0.534-1.036) | 0.080        |  |
| Coffee                      |           |            |                    |       |                    |              |  |
| No                          | 394(93.4) | 470(92.5)  | 1.000              |       | 1.000              |              |  |
| Yes                         | 28(6.6)   | 38(7.5)    | 0.879(0.530-1.458) | 0.617 | 0.627(0.345-1.140) | 0.126        |  |
| Tea                         |           |            |                    |       |                    |              |  |
| No                          | 354(84.1) | 431(85.7)  | 1.000              |       | 1.000              |              |  |
| Yes                         | 67(15.9)  | 72(14.3)   | 1.133(0.790-1.626) | 0.498 | 0.96(0.634-1.473)  | 0.874        |  |
| Soda                        |           |            |                    |       |                    |              |  |
| No                          | 404(96.4) | 478(94.1)  | 1.000              |       | 1.000              |              |  |
| Yes                         | 15(3.6)   | 30(5.9)    | 0.592(0.314-1.115) | 0.105 | 0.607(0.298-1.235) | 0.168        |  |
| Juice                       |           |            |                    |       |                    |              |  |
| No                          | 387(92.6) | 467(91.9)  | 1.000              |       | 1.000              |              |  |
| Yes                         | 31(7.4)   | 41(8.1)    | 0.912(0.561-1.483) | 0.711 | 0.715(0.417-1.226) | 0.223        |  |
| Fried food (times/month)    |           |            |                    |       |                    |              |  |
| <1                          | 291(69.1) | 382(76.2)  | 1.000              |       | 1.000              |              |  |
| 1                           | 130(30.9) | 119(23.8)  | 1.434(1.071-1.920) | 0.015 | 1.247(0.899-1.729) | 0.186        |  |
| Smoked food(times/month)    |           |            |                    |       |                    |              |  |
| <1                          | 234(85.4) | 375(78.8)  | 1.000              |       | 1.000              |              |  |
| 1                           | 40(14.6)  | 101(21.2)  | 0.635(0.425-0.948) | 0.026 | 0.583(0.366-0.929) | <b>0.023</b> |  |
| Allium food(times/week)     |           |            |                    |       |                    |              |  |
| <4                          | 294(69.7) | 231(45.7)  | 1.000              |       | 1.000              |              |  |
| 4                           | 128(30.3) | 275(54.3)  | 0.366(0.279-0.480) | 0.000 | 0.428(0.317-0.579) | <b>0.000</b> |  |
| Garlic(times/week)          |           |            |                    |       |                    |              |  |
| <4                          | 50(16.0)  | 221 (43.7) | 1.000              |       | 1.000              |              |  |
| 4                           | 263(84.0) | 285 (56.3) | 0.175(0.124-0.246) | 0.000 | 0.228(0.157-0.332) | <b>0.000</b> |  |
| Sauerkraut(times/week)      |           |            |                    |       |                    |              |  |
| <2                          | 263(62.2) | 285(56.1)  | 1.000              |       | 1.000              |              |  |
| 2                           | 160(37.8) | 223(43.9)  | 0.778(0.598-1.012) | 0.061 | 0.821(0.607-1.110) | 0.200        |  |
| Pickles (times/week)        |           |            |                    |       |                    |              |  |
| <2                          | 185(43.8) | 235(46.7)  | 1.000              |       | 1.000              |              |  |
| 2                           | 237(56.2) | 268(53.3)  | 1.123(0.866-1.457) | 0.381 | 1.357(1.010-1.824) | <b>0.043</b> |  |
| Canning fruit(times/month)  |           |            |                    |       |                    |              |  |
| <1                          | 343(81.9) | 438(86.2)  | 1.000              |       | 1.000              |              |  |
| 1                           | 76(18.1)  | 70(13.8)   | 1.386(0.973-1.976) | 0.071 | 1.290(0.967-1.918) | 0.209        |  |
| Canning meat (times/month)  |           |            |                    |       |                    |              |  |
| <1                          | 390(92.6) | 472(94.0)  | 1.000              |       | 1.000              |              |  |
| 1                           | 31(7.4)   | 30(6.0)    | 1.251(0.744-2.103) | 0.399 | 1.048(0.581-1.893) | 0.875        |  |
| Overnight food (times/week) |           |            |                    |       |                    |              |  |
| 3                           | 239(57.2) | 350(70.4)  | 1.000              |       | 1.000              |              |  |
| >3                          | 179(42.8) | 147(29.6)  | 1.783(1.357-2.343) | 0.000 | 1.934(1.422-2.632) | <b>0.000</b> |  |
| Sports                      |           |            |                    |       |                    |              |  |
| No                          | 270(64.4) | 270(53.7)  | 1.000              |       | 1.000              |              |  |
| Yes                         | 149(35.6) | 233(46.3)  | 0.639(0.490-0.834) | 0.001 | 0.490(0.362-0.665) | <b>0.000</b> |  |
| Smoking                     |           |            |                    |       |                    |              |  |

|                               |           |           |                     |       |                     |              |
|-------------------------------|-----------|-----------|---------------------|-------|---------------------|--------------|
| Never                         | 367(87.0) | 449(88.4) | 1.000               |       | 1.000               |              |
| Ever                          | 55(13.0)  | 59(11.6)  | 1.140(0.770-1.689)  | 0.511 | 1.220(0.771-1.932)  | 0.396        |
| Alcohol                       |           |           |                     |       |                     |              |
| Never                         | 362(87.4) | 439(92.0) | 1.000               |       | 1.000               |              |
| Ever                          | 52(12.6)  | 38(8.0)   | 1.659(1.068-2.579)  | 0.024 | 1.495(0.910-2.455)  | 0.112        |
| Mammary gland disease history |           |           |                     |       |                     |              |
| No                            | 261(65.4) | 425(84.5) | 1.000               |       | 1.000               |              |
| Yes                           | 138(34.6) | 78(15.5)  | 2.881(2.097-3.958)  | 0.000 | 2.412(1.678-3.465)  | <b>0.000</b> |
| Gynecologic surgery           |           |           |                     |       |                     |              |
| No                            | 263(62.2) | 320(63.1) | 1.000               |       | 1.000               |              |
| Yes                           | 160(37.8) | 187(36.9) | 1.041(0.797-1.359)  | 0.768 | 1.164(0.857-1.581)  | 0.332        |
| Menstrual regularity          |           |           |                     |       |                     |              |
| Yes                           | 342(82.2) | 458(90.7) | 1.000               |       | 1.000               |              |
| No                            | 74(17.8)  | 47(9.3)   | 2.108(1.425-3.119)  | 0.000 | 1.891(1.218-2.936)  | <b>0.005</b> |
| Pregnant times                |           |           |                     |       |                     |              |
| <3                            | 221(53.0) | 305(61.5) | 1.000               |       | 1.000               |              |
| 3                             | 196(47.0) | 191(38.5) | 1.416(1.088-1.844)  | 0.010 | 1.433(1.055-1.945)  | <b>0.021</b> |
| Breast massage                |           |           |                     |       |                     |              |
| No                            | 185(46.7) | 361(74.0) | 1.000               |       | 1.000               |              |
| Yes                           | 211(53.3) | 127(26.0) | 3.268(2.462-4.337)  | 0.000 | 3.746(2.720-5.159)  | <b>0.000</b> |
| Estrogenic medication history |           |           |                     |       |                     |              |
| No                            | 394(94.3) | 497(97.8) | 1.000               |       | 1.000               |              |
| Yes                           | 24(5.7)   | 11(2.2)   | 2.747(1.329-5.676)  | 0.006 | 2.180(0.985-4.824)  | 0.054        |
| Endocrine medication history  |           |           |                     |       |                     |              |
| No                            | 406(97.4) | 498(98.4) | 1.000               |       | 1.000               |              |
| Yes                           | 11(2.6)   | 8(1.6)    | 1.687(0.672-4.233)  | 0.266 | 1.204(0.446-3.254)  | 0.714        |
| IUD(intra uterine device)     |           |           |                     |       |                     |              |
| No                            | 105(25.1) | 157(30.9) | 1.000               |       | 1.000               |              |
| Yes                           | 313(74.9) | 351(69.1) | 1.332(0.996-1.782)  | 0.053 | 1.443(1.040-2.002)  | <b>0.028</b> |
| Oral contraceptive pill       |           |           |                     |       |                     |              |
| No                            | 363(87.1) | 457(90.1) | 1.000               |       | 1.000               |              |
| Yes                           | 54(12.9)  | 50(9.9)   | 1.360(0.904-2.046)  | 0.141 | 1.267(0.794-2.022)  | 0.320        |
| Menopause status              |           |           |                     |       |                     |              |
| No                            | 191(46.2) | 227(44.6) | 1.000               |       | 1.000               |              |
| Yes                           | 222(53.8) | 282(55.4) | 0.936(0.721-1.214)  | 0.617 | 0.678(0.500-0.919)  | <b>0.012</b> |
| Mammary gland hyperplasia     |           |           |                     |       |                     |              |
| No                            | 332(79.4) | 488(96.3) | 1.000               |       | 1.000               |              |
| Yes                           | 86(20.6)  | 19(3.7)   | 6.666(3.978-11.169) | 0.000 | 6.013(3.416-10.582) | <b>0.000</b> |
| Psychological stress score    |           |           |                     |       |                     |              |
| 15                            | 74(17.5)  | 163(32.5) | 1.000               |       | 1.000               |              |
| 16-33                         | 224(53.1) | 253(50.4) | 1.950(1.404-2.708)  | 0.000 | 1.909(1.316-2.770)  | <b>0.001</b> |
| >33                           | 124(29.4) | 86(17.1)  | 3.176(2.153-4.685)  | 0.000 | 3.070(1.976-4.769)  | <b>0.000</b> |
| Health care products          |           |           |                     |       |                     |              |
| No                            | 244(58.5) | 358(72.3) | 1.000               |       | 1.000               |              |
| Yes                           | 173(41.5) | 137(27.7) | 1.853(1.405-2.444)  | 0.000 | 1.685(1.224-2.320)  | <b>0.001</b> |
| Bra wearing                   |           |           |                     |       |                     |              |
| rarely                        | 112(26.9) | 152(30.6) | 1.000               |       | 1.000               |              |
| general                       | 304(73.1) | 345(69.4) | 1.196(0.896-1.596)  | 0.225 | 1.213(0.853-1.726)  | 0.282        |

OR<sub>crude</sub>, odds ratio generated by univariate logistic regression; OR<sub>adj</sub>, odds ratio generated by multivariate logistic regression adjusted by education, occupation, marital status, and family history of cancer; 95% CI, 95% confidence interval.

**Note:**

Soybean includes soybean milk, bean curd, processed soybean products.

Seafood includes shrimp, crab, snail and shellfish.

Sports: We defined “Yes” as 1 time/week in the last year. The sports includes yangge dance, hiking, running, swimming, rope skipping, fitness activities, gymnastics, yoga, qigong, Taijiquan, football, basketball, volleyball, badminton.

Breast massage: breast massage or kneading to promote milk discharge and secretion in lactation.

Health care products: We defined “Yes” as taking the following health care products 3 times/week for more

than 2 consecutive months in the last year, including donkey-hide gelatin, honey, royal jelly, propolis, fish oil, spirulina, protein powder, etc.

Menstrual cycle: regular (cycle length: 22–38 days within the previous 3 months) with no use of any regular (daily/weekly) medication; irregularity: get no periods, get periods too frequently, have unpredictable menstrual bleeding, or have painful periods.



**Supplemental Table 4**

Association of environmental exposures and *DUSP1* methylation in breast tumour DNA

| Factor                        | <i>DUSP1</i> methylation status |              | Univariate analysis          |              |
|-------------------------------|---------------------------------|--------------|------------------------------|--------------|
|                               | Methylated                      | Unmethylated | OR <sub>crude</sub> (95% CI) | P-value      |
| Menstrual regularity          |                                 |              |                              | <b>0.012</b> |
| No                            | 54(72.0)                        | 21(28.0)     | 1.000                        |              |
| Yes                           | 134(55.8)                       | 106(44.2)    | 0.487(0.277-0.856)           |              |
| Menopause status              |                                 |              |                              | 0.219        |
| No                            | 76(63.9)                        | 43(36.1)     | 1.000                        |              |
| Yes                           | 112(56.9)                       | 85(43.1)     | 0.746(0.467-1.191)           |              |
| Breast massage                |                                 |              |                              | 0.645        |
| Yes                           | 85(57.0)                        | 64(43.0)     | 1.000                        |              |
| No                            | 96(59.6)                        | 65(40.4)     | 1.112(0.708-1.748)           |              |
| Oral contraceptive            |                                 |              |                              | 0.179        |
| No                            | 159(57.6)                       | 117(42.4)    | 1.000                        |              |
| Yes                           | 32(68.1)                        | 15(31.9)     | 1.570(0.813-3.032)           |              |
| IUD (intra uterine device)    |                                 |              |                              | 0.340        |
| No                            | 57(63.3)                        | 33(36.7)     | 1.000                        |              |
| Yes                           | 134(57.5)                       | 99(42.5)     | 0.784(0.475-1.294)           |              |
| Mammary gland hyperplasia     |                                 |              |                              | 0.081        |
| No                            | 157(57.3)                       | 117(42.7)    | 1.000                        |              |
| Yes                           | 34(70.8)                        | 14(29.2)     | 1.810(0.929-3.526)           |              |
| Mammary gland disease history |                                 |              |                              | 0.196        |
| No                            | 122(57.8)                       | 89(42.2)     | 1.000                        |              |
| Yes                           | 63(65.6)                        | 33(34.4)     | 0.718(0.435-1.186)           |              |
| Coarse grains(g/week)         |                                 |              |                              | 0.316        |
| 50                            | 103(62.0)                       | 63(38.0)     | 1.000                        |              |
| >50                           | 72(56.2)                        | 56(43.8)     | 0.786(0.492-1.257)           |              |
| Vegetable(g/day)              |                                 |              |                              | 0.614        |
| 500                           | 122(61.0)                       | 78(39.0)     | 1.000                        |              |
| >500                          | 68(58.1)                        | 49(41.9)     | 0.887(0.558-1.412)           |              |
| Soybean(times/week)           |                                 |              |                              | <b>0.007</b> |
| 1                             | 72(51.8)                        | 67(48.2)     | 1.000                        |              |
| >1                            | 119(66.9)                       | 59(33.1)     | 1.877(1.189-2.962)           |              |
| Fruit(g/week)                 |                                 |              |                              | <b>0.021</b> |
| 1000                          | 89(67.9)                        | 42(32.1)     | 1.000                        |              |
| >1000                         | 100(54.9)                       | 82(45.1)     | 0.576(0.360-0.920)           |              |
| Allium food(times/week)       |                                 |              |                              | 0.253        |
| 4                             | 132(61.4)                       | 83(38.6)     | 1.000                        |              |
| >4                            | 58(54.7)                        | 48(45.3)     | 0.760(0.474-1.217)           |              |
| Fat meat                      |                                 |              |                              | 0.464        |
| Yes                           | 64(62.1)                        | 39(37.9)     | 1.000                        |              |
| No                            | 129(57.8)                       | 94(42.2)     | 0.836(0.518-1.350)           |              |
| Beef and mutton(g/week)       |                                 |              |                              | 0.458        |
| <250                          | 110(58.2)                       | 79(41.8)     | 1.000                        |              |
| 250                           | 78(62.4)                        | 47(37.6)     | 1.192(0.750-1.894)           |              |
| Poultry meat(g/week)          |                                 |              |                              | 0.313        |
| <250                          | 99(57.2)                        | 74(42.8)     | 1.000                        |              |
| 250                           | 88(62.9)                        | 52(37.1)     | 1.265(0.801-1.996)           |              |
| Sea-fish(times/month)         |                                 |              |                              | 0.668        |
| <1                            | 108(58.1)                       | 78(41.9)     | 1.000                        |              |
| 1                             | 84(60.4)                        | 55(39.6)     | 1.103(0.705-1.726)           |              |

|                            |           |           |                    |  |       |
|----------------------------|-----------|-----------|--------------------|--|-------|
| Seafood(times/month)       |           |           |                    |  | 0.786 |
| <1                         | 163(59.7) | 110(40.3) | 1.000              |  |       |
| 1                          | 30(57.7)  | 22(42.3)  | 0.920(0.505-1.678) |  |       |
| Egg(per/week)              |           |           |                    |  | 0.281 |
| 3                          | 69(55.6)  | 55(44.4)  | 1.000              |  |       |
| >3                         | 124(61.7) | 77(38.3)  | 1.284(0.815-2.022) |  |       |
| Milk                       |           |           |                    |  | 0.982 |
| No                         | 120(59.4) | 82(40.6)  | 1.000              |  |       |
| Yes                        | 53(59.6)  | 36(40.4)  | 1.006(0.605-1.672) |  |       |
| Sauerkraut(times/week)     |           |           |                    |  | 0.335 |
| <2                         | 81(56.2)  | 63(43.8)  | 1.000              |  |       |
| 2                          | 112(61.5) | 70(38.5)  | 1.244(0.798-1.941) |  |       |
| Tea                        |           |           |                    |  | 0.221 |
| Yes                        | 26(68.4)  | 12(31.6)  | 1.000              |  |       |
| No                         | 167(58.0) | 121(42.0) | 0.637(0.309-1.313) |  |       |
| Fried food(times/month)    |           |           |                    |  | 0.539 |
| <1                         | 124(60.5) | 81(39.5)  | 1.000              |  |       |
| 1                          | 69(57.0)  | 52(43.0)  | 0.867(0.549-1.368) |  |       |
| Psychological stress score |           |           |                    |  | 0.869 |
| 15                         | 44(61.1)  | 28(38.9)  | 1.000              |  |       |
| 16-33                      | 101(58.0) | 73(42.0)  | 0.880(0.502-1.544) |  | 0.657 |
| >33                        | 48(60.8)  | 31(39.2)  | 0.985(0.512-1.896) |  | 0.965 |
| Canning fruit(times/month) |           |           |                    |  | 0.935 |
| <1                         | 125(57.9) | 91(42.1)  | 1.000              |  |       |
| 1                          | 31(58.5)  | 22(41.5)  | 1.026(0.558-1.887) |  |       |
| Canning meat(times/month)  |           |           |                    |  | 0.527 |
| <1                         | 178(59.7) | 120(40.3) | 1.000              |  |       |
| 1                          | 15(53.6)  | 13(46.4)  | 0.778(0.357-1.693) |  |       |
| Overnight food(times/week) |           |           | 0.315              |  |       |
| 3                          | 118(57.0) | 89(43.0)  | 1.000              |  |       |
| >3                         | 74(62.7)  | 44(37.3)  | 1.268(0.798-2.017) |  |       |
| Smoke                      |           |           |                    |  | 0.926 |
| Never                      | 169(59.3) | 116(40.7) | 1.000              |  |       |
| Ever                       | 24(58.5)  | 17(41.5)  | 0.969(0.498-1.884) |  |       |
| Alcohol                    |           |           |                    |  | 0.736 |
| Never                      | 165(59.4) | 113(40.6) | 1.000              |  |       |
| Ever                       | 18(56.2)  | 14(43.8)  | 0.881(0.421-1.842) |  |       |
| Sports                     |           |           |                    |  | 0.439 |
| Yes                        | 60(56.6)  | 46(43.4)  | 1.000              |  |       |
| No                         | 132(61.1) | 84(38.9)  | 1.205(0.752-1.931) |  |       |

OR<sub>crude</sub>, odds ratio generated by univariate logistic regression; 95% CI, 95% confidence interval.

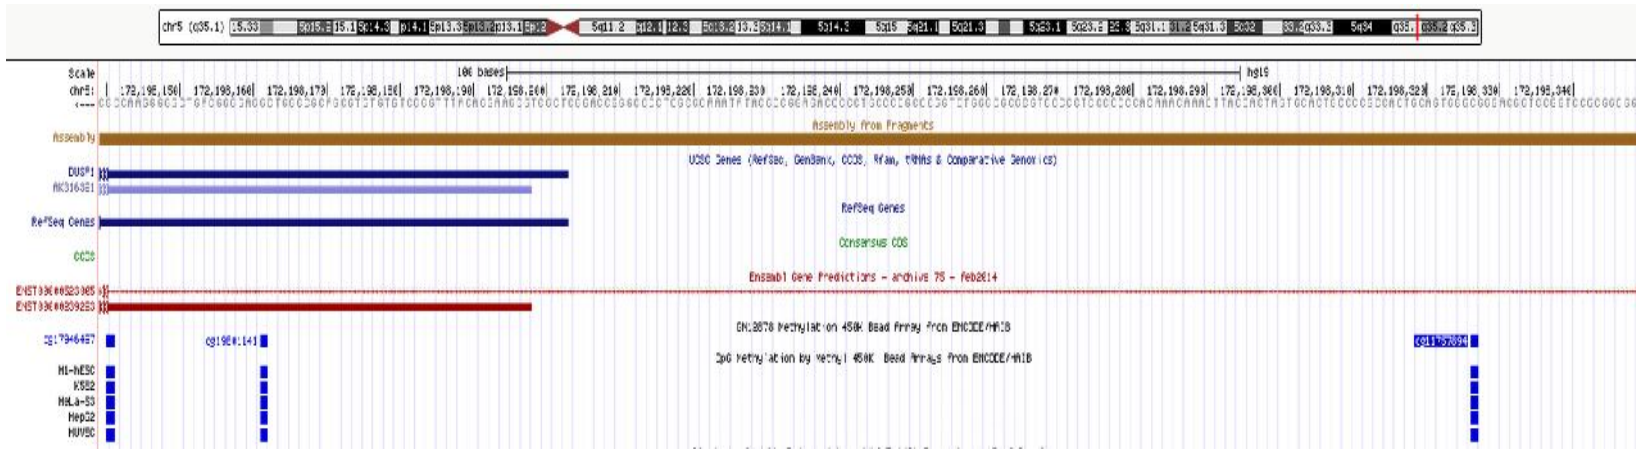

**Supplemental Figure 1**

Methylation detecting region (range=chr5:172198165-172198336, 171bp) of *DUSP1* gene by Methylation-sensitive high-resolution melting analysis
